# Supplementary material for: Myotendinous Thermoregulation in National Level Sprinters after a Unilateral Fatigue Acute Bout. A Descriptive Study
Source: Preprints.org preprint supplement (doi:10.20944/preprints202309.1891.v1), 2023-09-28
Supplement: Supplementary file 1 [file supplementary]

Dear editor and reviewer:

We believe that the surface thermography technique can be considered as "wearable" for the analysis of thermoregulation, obtaining data in very few minutes that can help practitioners to make immediate decisions on recovery strategies. This instrument (thermograph) is small in size and can be moved to the training and competition areas without problems, being able to take data just before and after exercise. The images can be quickly analysed with software and provide data within minutes. We know that basketball teams are already using this instrument to assess during competitive games and we believe it can be transferable to any other sport, such as athletics and race walking. For this reason, initial studies such as ours are necessary to provide knowledge of the thermographic behaviour of some specific structures so that professionals have guidelines when applying this technique.

It should also be noted that we have additionally modified the manuscript to indicate the possibilities offered by thermography as a technique for obtaining rapid information during training and competitions. We have introduced new text in the introduction and conclusion sections, as well as thermographic images of the study.

With this, we would like to convey our vision of the current state of knowledge and its possible future applications, thus justifying that our paper can be included in the subject matter of the special issue of Sensors.

Thank you very much for your attention.

Best regards.

Prof. Dr. Cristian Marín-Pagán
